# Supplementary material for: Hominid Brain Evolution
Source: Springer Nature journal article supplement (doi:10.1007/s12110-008-9054-0), 2009-01-09
Supplement: 12110_2008_9054_MOESM1_ESM.pdf [file 12110_2008_9054_MOESM1_ESM.pdf]

Table A: Data used in the analysis (see Table B for fossil identification)

| Fossil No. | CC      | Latitude | Longitude | North | East | Location | Parasites | Age (mya) | Mean Temperature | Temperature Variation | Isosd       | Population Density |
|------------|---------|----------|-----------|-------|------|----------|-----------|-----------|------------------|-----------------------|-------------|--------------------|
| 1          | 595     | 27       | 23        | 0     | 1    | 1        | 1         | 1.9       | 17.8             | 29                    | 0.218223437 | 13                 |
| 2          | 475     | 27       | 23        | 0     | 1    | 1        | 1         | 1.9       | 17.8             | 29                    | 0.218223437 | 13                 |
| 3          | 507     | 27       | 23        | 0     | 1    | 1        | 1         | 1.9       | 17.8             | 29                    | 0.218223437 | 13                 |
| 4          | 570     | 27       | 23        | 0     | 1    | 1        | 1         | 1.9       | 17.8             | 29                    | 0.218223437 | 13                 |
| 5          | 500     | 7        | 40.5      | 1     | 1    | 2        | 7         | 1.89      | 22.2             | 19                    | 0.212807364 | 13                 |
| 6          | 776     | 4        | 38        | 1     | 1    | 2        | 7         | 1.89      | 24.7             | 15                    | 0.212807364 | 13                 |
| 7          | 506.333 | 4        | 38        | 1     | 1    | 2        | 7         | 1.89      | 24.7             | 15                    | 0.212807364 | 13                 |
| 8          | 622.5   | 4        | 38        | 1     | 1    | 2        | 7         | 1.89      | 24.7             | 15                    | 0.212807364 | 13                 |
| 9          | 782.5   | 4        | 38        | 1     | 1    | 2        | 7         | 1.85      | 24.7             | 15                    | 0.246603596 | 16                 |
| 10         | 616     | 4        | 38        | 1     | 1    | 2        | 7         | 1.85      | 24.7             | 15                    | 0.246603596 | 16                 |
| 11         | 855     | 8        | 110       | 0     | 1    | 10       | 3         | 1.66      | 25.8             | 8                     | 0.222701943 | 19                 |
| 12         | 597     | 4        | 34        | 0     | 1    | 2        | 7         | 1.8       | 22.3             | 18                    | 0.232941294 | 17                 |
| 13         | 825.4   | 4        | 38        | 1     | 1    | 2        | 7         | 1.78      | 24.7             | 15                    | 0.252773704 | 17                 |
| 14         | 674     | 4        | 34        | 0     | 1    | 2        | 7         | 1.78      | 22.3             | 18                    | 0.252773704 | 17                 |
| 15         | 775     | 40       | 47        | 1     | 1    | 6        | 4         | 1.86      | 5.8              | 32                    | 0.25577606  | 16                 |
| 16         | 650     | 40       | 47        | 1     | 1    | 6        | 4         | 1.86      | 5.8              | 32                    | 0.25577606  | 16                 |
| 17         | 600     | 40       | 47        | 1     | 1    | 6        | 4         | 1.86      | 5.8              | 32                    | 0.25577606  | 16                 |
| 18         | 639.2   | 4        | 34        | 0     | 1    | 2        | 7         | 1.67      | 22.3             | 18                    | 0.221164939 | 17                 |
| 19         | 662.286 | 4        | 34        | 0     | 1    | 2        | 7         | 1.66      | 22.3             | 18                    | 0.222701943 | 19                 |
| 20         | 1000    | 7.5778   | 110       | 0     | 1    | 10       | 3         | 0.25      | 25.8             | 8                     | 0.417855328 | 51                 |
| 21         | 904.5   | 3.9008   | 38        | 1     | 1    | 2        | 7         | 1.6       | 24.7             | 15                    | 0.260943995 | 19                 |
| 22         | 825.667 | 4        | 38        | 1     | 1    | 2        | 7         | 1.57      | 24.7             | 15                    | 0.264428076 | 19                 |
| 23         | 850     | 7.5778   | 110       | 0     | 1    | 10       | 3         | 0.21      | 25.8             | 8                     | 0.425454367 | 58                 |
| 24         | 1070.5  | 4        | 34        | 0     | 1    | 2        | 7         | 1.2       | 22.3             | 18                    | 0.309443896 | 28                 |
| 25         | 779     | 34.2     | 104       | 1     | 1    | 9        | 3         | 1.15      | 6.9              | 41                    | 0.301799443 | 29                 |
| 26         | 800     | 14.8333  | 39.5      | 1     | 1    | 2        | 7         | 1         | 25.5             | 14                    | 0.299464168 | 29                 |
| 27         | 856     | 7.5778   | 110       | 0     | 1    | 10       | 3         | 1.25      | 25.8             | 8                     | 0.298084327 | 28                 |
| 28         | 940     | 7.3667   | 110       | 0     | 1    | 10       | 3         | 0.9       | 25.8             | 8                     | 0.29634621  | 30                 |
| 29         | 792.571 | 7.5778   | 110       | 0     | 1    | 10       | 3         | 1.25      | 25.8             | 8                     | 0.298084327 | 28                 |
| 30         | 900     | 7.5778   | 110       | 0     | 1    | 10       | 3         | 1.25      | 25.8             | 8                     | 0.298084327 | 28                 |
| 31         | 951     | 7.5778   | 110       | 0     | 1    | 10       | 3         | 1.25      | 25.8             | 8                     | 0.298084327 | 28                 |
| 32         | 1020    | 7.5778   | 110       | 0     | 1    | 10       | 3         | 1.25      | 25.8             | 8                     | 0.298084327 | 28                 |
| 33         | 1300    | 32       | 35        | 1     | 1    | 6        | 4         | 0.09      | 19.2             | 26                    | 0.407602948 | 75                 |
| 34         | 1554.5  | 32       | 35        | 1     | 1    | 6        | 4         | 0.09      | 19.2             | 26                    | 0.407602948 | 75                 |
| 35         | 1499.5  | 32       | 35        | 1     | 1    | 6        | 4         | 0.09      | 19.2             | 26                    | 0.407602948 | 75                 |

| Fossil No. | CC       | Latitude | Longitude | North | East | Location | Parasites | Age (mya) | Mean Temperature | Temperature Variation | Isosd       | Population Density |
|------------|----------|----------|-----------|-------|------|----------|-----------|-----------|------------------|-----------------------|-------------|--------------------|
| 36         | 1587.333 | 32       | 35        | 1     | 1    | 6        | 4         | 0.09      | 19.2             | 26                    | 0.407602948 | 75                 |
| 37         | 868.6    | 7.5778   | 110       | 0     | 1    | 10       | 3         | 1.25      | 25.8             | 8                     | 0.298084327 | 28                 |
| 38         | 1185     | 41.55    | 13.5      | 1     | 1    | 4        | 1         | 0.85      | 13.4             | 25                    | 0.357515549 | 31                 |
| 39         | 732.33   | 4        | 34        | 0     | 1    | 2        | 7         | 0.84      | 22.3             | 18                    | 0.390312661 | 31                 |
| 40         | 1300     | 35.4158  | 2         | 1     | 1    | 3        | 3         | 0.75      | 22.5             | 20                    | 0.382977102 | 33                 |
| 41         | 1650.2   | 45       | 1         | 1     | 1    | 4        | 1         | 0.068     | 10.7             | 24                    | 0.402105157 | 77                 |
| 42         | 1250     | 10.6333  | 40.5      | 1     | 1    | 2        | 7         | 0.6       | 22.2             | 19                    | 0.368289722 | 38                 |
| 43         | 1226.75  | 35       | 5.5       | 1     | 0    | 3        | 3         | 0.06      | 13.3             | 22                    | 0.396490598 | 80                 |
| 44         | 1581     | 41       | 68        | 1     | 1    | 7        | 1         | 0.06      | 12.1             | 47                    | 0.396490598 | 80                 |
| 45         | 1551     | 41.2     | 12.5      | 1     | 1    | 4        | 1         | 0.055     | 13.4             | 25                    | 0.394052574 | 82                 |
| 46         | 1745     | 33       | 35        | 1     | 1    | 6        | 4         | 0.051     | 19.2             | 26                    | 0.388439222 | 82                 |
| 47         | 1056.333 | 7.3833   | 110       | 0     | 1    | 10       | 3         | 0.5       | 25.8             | 8                     | 0.411476483 | 38                 |
| 48         | 1337.75  | 52       | 7         | 1     | 1    | 5        | 0         | 0.05      | 8.4              | 27                    | 0.388439222 | 90                 |
| 49         | 1320     | 49.0167  | 19.5      | 1     | 1    | 5        | 0         | 0.05      | 6.8              | 29                    | 0.388439222 | 90                 |
| 50         | 1626     | 42.7333  | 1.5       | 1     | 1    | 4        | 1         | 0.05      | 10.7             | 24                    | 0.388439222 | 90                 |
| 51         | 1345.25  | 44       | 0         | 1     | 1    | 4        | 1         | 0.05      | 10.7             | 24                    | 0.388439222 | 90                 |
| 52         | 1650     | 36       | 43.5      | 1     | 1    | 6        | 4         | 0.05      | 21.4             | 34                    | 0.388439222 | 90                 |
| 53         | 1550     | 36       | 43.5      | 1     | 1    | 6        | 4         | 0.05      | 21.4             | 34                    | 0.388439222 | 90                 |
| 54         | 1457.5   | 50.8     | 4.5       | 1     | 1    | 5        | 0         | 0.05      | 9.6              | 24                    | 0.388439222 | 90                 |
| 55         | 1487.4   | 50.8     | 4.5       | 1     | 1    | 5        | 0         | 0.05      | 9.6              | 24                    | 0.388439222 | 90                 |
| 56         | 1138.667 | 42.8167  | 1         | 1     | 1    | 4        | 1         | 0.4       | 10.7             | 24                    | 0.338519963 | 40                 |
| 57         | 911      | 35       | 7         | 1     | 0    | 3        | 3         | 0.4       | 17.1             | 20                    | 0.338519963 | 40                 |
| 58         | 1030     | 38       | 104       | 1     | 1    | 9        | 3         | 0.21      | 6.9              | 41                    | 0.425454367 | 58                 |
| 59         | 937.5    | 38       | 104       | 1     | 1    | 9        | 3         | 0.21      | 6.9              | 41                    | 0.425454367 | 58                 |
| 60         | 1220     | 38       | 104       | 1     | 1    | 9        | 3         | 0.21      | 6.9              | 41                    | 0.425454367 | 58                 |
| 61         | 1225     | 38       | 104       | 1     | 1    | 9        | 3         | 0.21      | 6.9              | 41                    | 0.425454367 | 58                 |
| 62         | 1015     | 38       | 104       | 1     | 1    | 9        | 3         | 0.21      | 6.9              | 41                    | 0.425454367 | 58                 |
| 63         | 1030     | 38       | 104       | 1     | 1    | 9        | 3         | 0.21      | 6.9              | 41                    | 0.425454367 | 58                 |
| 64         | 1305     | 52       | 0         | 1     | 1    | 5        | 0         | 0.14      | 8.4              | 20                    | 0.384918654 | 67                 |
| 65         | 1400     | 40.8167  | 35        | 1     | 1    | 6        | 4         | 0.04      | 19.2             | 26                    | 0.383797175 | 93                 |
| 66         | 1486.2   | 44.9833  | 1         | 1     | 1    | 4        | 1         | 0.04      | 10.7             | 24                    | 0.383797175 | 93                 |
| 67         | 850      | 38       | 104       | 1     | 1    | 9        | 3         | 1.8       | 6.9              | 41                    | 0.232941294 | 17                 |
| 68         | 1310     | 14       | 28        | 0     | 1    | 2        | 7         | 0.35      | 21.4             | 22                    | 0.324690513 | 42                 |
| 69         | 1100     | 3        | 34        | 0     | 1    | 2        | 7         | 0.35      | 22.3             | 18                    | 0.324690513 | 42                 |
| 70         | 1216.667 | 32       | 18        | 0     | 1    | 1        | 1         | 0.35      | 17.8             | 29                    | 0.324690513 | 42                 |
| 71         | 1100     | 32.817   | 104       | 1     | 1    | 9        | 3         | 0.35      | 6.9              | 41                    | 0.324690513 | 42                 |
| 72         | 1432     | 49.2983  | 8.5       | 1     | 1    | 5        | 0         | 0.3       | 8.4              | 27                    | 0.417255655 | 47                 |

| Fossil No. | CC       | Latitude | Longitude | North | East | Location | Parasites | Age (mya) | Mean Temperature | Temperature Variation | Isosd       | Population Density |
|------------|----------|----------|-----------|-------|------|----------|-----------|-----------|------------------|-----------------------|-------------|--------------------|
| 73         | 1111.192 | 47       | 10        | 1     | 1    | 5        | 0         | 0.3       | 8.4              | 27                    | 0.417255655 | 47                 |
| 74         | 1235     | 10.0333  | 34        | 0     | 1    | 2        | 7         | 0.035     | 22.3             | 18                    | 0.377070104 | 95                 |
| 75         | 1266.556 | 40.365   | 22        | 1     | 1    | 4        | 1         | 0.325     | 15.4             | 27                    | 0.396802573 | 43                 |
| 76         | 1390     | 43       | 3.5       | 1     | 0    | 4        | 1         | 0.5       | 13.3             | 22                    | 0.411476483 | 38                 |
| 77         | 1125     | 43       | 3.5       | 1     | 0    | 4        | 1         | 0.5       | 13.3             | 22                    | 0.411476483 | 38                 |
| 78         | 1153.333 | 43       | 3.5       | 1     | 0    | 4        | 1         | 0.5       | 13.3             | 22                    | 0.411476483 | 38                 |
| 79         | 1249.333 | 23.3     | 70.5      | 1     | 1    | 8        | 5         | 0.3       | 23.7             | 34                    | 0.417255655 | 47                 |
| 80         | 1400     | 3.25     | 38        | 1     | 1    | 2        | 7         | 0.14      | 24.7             | 15                    | 0.385       | 67                 |
| 81         | 1012.5   | 31.7167  | 104       | 1     | 1    | 9        | 3         | 0.25      | 6.9              | 41                    | 0.417855328 | 51                 |
| 82         | 1160     | 25.7     | 104       | 1     | 1    | 9        | 3         | 0.205     | 6.9              | 41                    | 0.432039854 | 59                 |
| 83         | 1450     | 50.9833  | 11        | 1     | 1    | 5        | 0         | 0.203     | 8.4              | 27                    | 0.425318887 | 60                 |
| 84         | 1121.429 | 7        | 34        | 0     | 1    | 2        | 7         | 0.2       | 22.3             | 18                    | 0.414916251 | 61                 |
| 85         | 1266.167 | 7        | 34        | 0     | 1    | 2        | 7         | 0.2       | 22.3             | 18                    | 0.414916251 | 61                 |
| 86         | 1115.714 | 7        | 34        | 0     | 1    | 2        | 7         | 0.2       | 22.3             | 18                    | 0.414916251 | 61                 |
| 87         | 1135     | 7        | 34        | 0     | 1    | 2        | 7         | 0.2       | 22.3             | 18                    | 0.414916251 | 61                 |
| 88         | 1109     | 7        | 34        | 0     | 1    | 2        | 7         | 0.2       | 22.3             | 18                    | 0.414916251 | 61                 |
| 89         | 900      | 7.3833   | 110       | 0     | 1    | 10       | 3         | 0.2       | 25.8             | 8                     | 0.414916251 | 61                 |
| 90         | 1316.667 | 42.05    | 104       | 1     | 1    | 9        | 3         | 0.187     | 6.9              | 41                    | 0.405555998 | 62                 |
| 91         | 1334.571 | 47.617   | 19.5      | 1     | 1    | 5        | 0         | 0.186     | 9.8              | 32                    | 0.407075204 | 63                 |
| 92         | 1200     | 50.3     | 3         | 1     | 1    | 5        | 0         | 0.178     | 10.7             | 24                    | 0.40956105  | 64                 |
| 93         | 1420     | 45.95    | 0         | 1     | 1    | 5        | 0         | 0.16      | 10.7             | 24                    | 0.406054306 | 65                 |
| 94         | 1065     | 46.583   | 0         | 1     | 1    | 5        | 0         | 0.151     | 10.7             | 24                    | 0.401801067 | 66                 |
| 95         | 1280     | 30       | 26        | 0     | 1    | 1        | 1         | 0.279     | 17.8             | 29                    | 0.410862309 | 48                 |
| 96         | 1375     | 3.25     | 38        | 1     | 1    | 2        | 7         | 0.15      | 24.7             | 15                    | 0.384918654 | 66                 |
| 97         | 1550     | 13.15    | 34        | 1     | 1    | 2        | 7         | 0.15      | 26.8             | 27                    | 0.384918654 | 66                 |
| 98         | 1450     | 46.1681  | 16        | 1     | 1    | 4        | 1         | 0.13      | 10.9             | 23                    | 0.384378768 | 73                 |
| 99         | 1200     | 46.1681  | 16        | 1     | 1    | 4        | 1         | 0.13      | 10.9             | 23                    | 0.384378768 | 73                 |
| 100        | 1432.5   | 7        | 40.5      | 1     | 1    | 2        | 7         | 0.195     | 22.2             | 19                    | 0.408297587 | 61                 |
| 101        | 1283.5   | 3.1667   | 34        | 0     | 1    | 2        | 7         | 0.125     | 22.3             | 18                    | 0.36220423  | 73                 |
| 102        | 1305     | 32       | 7         | 1     | 0    | 3        | 3         | 0.3       | 17.1             | 20                    | 0.417255655 | 47                 |
| 103        | 1400     | 32       | 7         | 1     | 0    | 3        | 3         | 0.27      | 17.1             | 20                    | 0.406021609 | 49                 |
| 104        | 1234.333 | 41.9     | 12.5      | 1     | 1    | 4        | 1         | 0.1       | 13.4             | 25                    | 0.413475128 | 75                 |
| 105        | 1295     | 41.9     | 12.5      | 1     | 1    | 4        | 1         | 0.1       | 13.4             | 25                    | 0.413475128 | 75                 |
| 106        | 1270.5   | 35       | 35        | 1     | 1    | 6        | 4         | 0.1       | 19.2             | 26                    | 0.413475128 | 75                 |
| 107        | 1000     | 32.05    | 104       | 1     | 1    | 9        | 3         | 1.66      | 6.9              | 41                    | 0.222701943 | 19                 |
| 108        | 1000     | 7.24     | 110       | 0     | 1    | 10       | 3         | 0.6       | 25.8             | 8                     | 0.368289722 | 38                 |
| 109        | 995      | 14.6667  | 40.5      | 1     | 1    | 2        | 7         | 0.1       | 22.2             | 19                    | 0.413475128 | 75                 |

| Fossil No. | CC   | Latitude | Longitude | North | East | Location | Parasites | Age (mya) | Mean Temperature | Temperature Variation | Isosd       | Population Density |
|------------|------|----------|-----------|-------|------|----------|-----------|-----------|------------------|-----------------------|-------------|--------------------|
| 110        | 1090 | 26.5     | 128       | 1     | 1    | 12       | 2         | 0.018     | 11.1             | 32                    | 0.397247483 | 126                |
| 111        | 1090 | 7        | 34        | 0     | 1    | 2        | 7         | 0.2       | 22.3             | 18                    | 0.414916251 | 61                 |
| 112        | 1170 | 26.5     | 128       | 1     | 1    | 12       | 2         | 0.018     | 11.1             | 32                    | 0.397247483 | 126                |
| 113        | 1280 | 32       | 35        | 1     | 1    | 6        | 4         | 0.09      | 19.2             | 26                    | 0.407602948 | 75                 |
| 114        | 1290 | 38       | 104       | 1     | 1    | 9        | 3         | 0.018     | 6.9              | 41                    | 0.397247483 | 126                |
| 115        | 1310 | 44       | 0         | 1     | 1    | 4        | 1         | 0.05      | 10.7             | 24                    | 0.388439222 | 90                 |
| 116        | 1322 | 49       | 16.5      | 1     | 1    | 5        | 0         | 0.026     | 7.5              | 30                    | 0.379526652 | 115                |
| 117        | 1354 | 45       | 0.5       | 1     | 0    | 4        | 1         | 0.0145    | 10.7             | 24                    | 0.392478942 | 127                |
| 118        | 1370 | 51       | 6.5       | 1     | 1    | 5        | 0         | 0.012     | 8.4              | 27                    | 0.39644267  | 132                |
| 119        | 1375 | 44       | 7.5       | 1     | 1    | 4        | 1         | 0.028     | 10.7             | 24                    | 0.378345024 | 101                |
| 120        | 1380 | 38       | 104       | 1     | 1    | 9        | 3         | 0.018     | 6.9              | 41                    | 0.397247483 | 126                |
| 121        | 1380 | 45       | 1         | 1     | 1    | 4        | 1         | 0.0206    | 10.7             | 24                    | 0.39131532  | 117                |
| 122        | 1390 | 26.5     | 128       | 1     | 1    | 12       | 2         | 0.018     | 11.1             | 32                    | 0.397247483 | 126                |
| 123        | 1414 | 44       | 8.5       | 1     | 1    | 4        | 1         | 0.0114    | 13.4             | 25                    | 0.394097668 | 136                |
| 124        | 1420 | 27       | 31.5      | 1     | 1    | 13       | 5         | 0.0333    | 22.1             | 28                    | 0.377247824 | 95                 |
| 125        | 1424 | 44       | 8.5       | 1     | 1    | 4        | 1         | 0.0114    | 13.4             | 25                    | 0.394097668 | 136                |
| 126        | 1430 | 45       | 4.5       | 1     | 1    | 4        | 1         | 0.0102    | 10.7             | 24                    | 0.389503389 | 141                |
| 127        | 1434 | 45       | 0.5       | 1     | 1    | 4        | 1         | 0.012     | 10.7             | 24                    | 0.39644267  | 132                |
| 128        | 1452 | 50.5     | 14        | 1     | 1    | 5        | 0         | 0.0265    | 7.5              | 30                    | 0.379526652 | 110                |
| 129        | 1484 | 38       | 12.5      | 1     | 1    | 4        | 1         | 0.011     | 13.4             | 25                    | 0.389503389 | 140                |
| 130        | 1490 | 44       | 8.5       | 1     | 1    | 4        | 1         | 0.0186    | 13.4             | 25                    | 0.387277852 | 120                |
| 131        | 1500 | 51       | 6.5       | 1     | 1    | 5        | 0         | 0.012     | 8.4              | 27                    | 0.39644267  | 132                |
| 132        | 1500 | 38       | 104       | 1     | 1    | 9        | 3         | 0.018     | 6.9              | 41                    | 0.397247483 | 126                |
| 133        | 1500 | 50.5     | 14.5      | 1     | 1    | 5        | 0         | 0.035     | 7.5              | 30                    | 0.377070104 | 95                 |
| 134        | 1518 | 50.5     | 14        | 1     | 1    | 5        | 0         | 0.0265    | 7.5              | 30                    | 0.379526652 | 110                |
| 135        | 1520 | 44       | 8.5       | 1     | 1    | 4        | 1         | 0.0114    | 13.4             | 25                    | 0.394097668 | 136                |
| 136        | 1522 | 49       | 16.5      | 1     | 1    | 5        | 0         | 0.026     | 7.5              | 30                    | 0.378345024 | 115                |
| 137        | 1531 | 52       | 8.5       | 1     | 1    | 5        | 0         | 0.0274    | 8.4              | 27                    | 0.38        | 106                |
| 138        | 1531 | 32       | 35        | 1     | 1    | 6        | 4         | 0.09      | 19.2             | 26                    | 0.407602948 | 75                 |
| 139        | 1535 | 32       | 35        | 1     | 1    | 6        | 4         | 0.09      | 19.2             | 26                    | 0.407602948 | 75                 |
| 140        | 1550 | 42       | 12.5      | 1     | 1    | 4        | 1         | 0.057     | 13.4             | 25                    | 0.394052574 | 81                 |
| 141        | 1555 | 44       | 1.5       | 1     | 1    | 4        | 1         | 0.012     | 10.7             | 24                    | 0.39644267  | 132                |
| 142        | 1555 | 50.5     | 14        | 1     | 1    | 5        | 0         | 0.0265    | 7.5              | 30                    | 0.379526652 | 110                |
| 143        | 1560 | 38       | 12.5      | 1     | 1    | 4        | 1         | 0.011     | 13.4             | 25                    | 0.389503389 | 140                |
| 144        | 1565 | 38       | 12.5      | 1     | 1    | 4        | 1         | 0.011     | 13.4             | 25                    | 0.389503389 | 140                |
| 145        | 1569 | 38       | 12.5      | 1     | 1    | 4        | 1         | 0.011     | 13.4             | 25                    | 0.389503389 | 140                |
| 146        | 1580 | 44       | 7.5       | 1     | 1    | 4        | 1         | 0.028     | 10.7             | 24                    | 0.378345024 | 101                |

| Fossil No. | CC   | Latitude | Longitude | North | East | Location | Parasites | Age (mya) | Mean Temperature | Temperature Variation | Isosd       | Population Density |
|------------|------|----------|-----------|-------|------|----------|-----------|-----------|------------------|-----------------------|-------------|--------------------|
| 147        | 1600 | 45       | 0.5       | 1     | 1    | 4        | 1         | 0.03      | 10.7             | 24                    | 0.378345024 | 97                 |
| 148        | 1608 | 50.5     | 14        | 1     | 1    | 5        | 0         | 0.0265    | 7.5              | 30                    | 0.379526652 | 110                |
| 149        | 1620 | 50.5     | 14.5      | 1     | 1    | 5        | 0         | 0.035     | 7.5              | 30                    | 0.377070104 | 95                 |
| 150        | 1661 | 44       | 8.5       | 1     | 1    | 4        | 1         | 0.0114    | 13.4             | 25                    | 0.394097668 | 136                |
| 151        | 1700 | 45       | 0.5       | 1     | 1    | 4        | 1         | 0.012     | 10.7             | 24                    | 0.39644267  | 132                |
| 152        | 1775 | 44       | 7.5       | 1     | 1    | 4        | 1         | 0.028     | 10.7             | 24                    | 0.378345024 | 101                |
| 153        | 1880 | 44       | 8.5       | 1     | 1    | 4        | 1         | 0.019     | 13.4             | 25                    | 0.39131532  | 119                |
| 154        | 1006 | 7.3833   | 110       | 0     | 1    | 10       | 3         | 0.8       | 25.8             | 8                     | 0.36580401  | 32                 |
| 155        | 1250 | 43.5     | 7.5       | 1     | 1    | 4        | 1         | 0.13      | 10.7             | 24                    | 0.384378768 | 73                 |
| 156        | 1362 | 50.5     | 5.5       | 1     | 1    | 5        | 0         | 0.06      | 10.7             | 24                    | 0.396490598 | 80                 |
| 157        | 1400 | 35       | 5.5       | 1     | 0    | 3        | 3         | 0.05      | 13.3             | 22                    | 0.388439222 | 90                 |
| 158        | 1450 | 46.1681  | 16        | 1     | 1    | 4        | 1         | 0.13      | 10.9             | 23                    | 0.384378768 | 73                 |
| 159        | 1205 | 46.1681  | 16        | 1     | 1    | 4        | 1         | 0.13      | 10.9             | 23                    | 0.384378768 | 73                 |
| 160        | 1450 | 32       | 35        | 1     | 1    | 6        | 4         | 0.1       | 19.2             | 26                    | 0.413475128 | 75                 |
| 161        | 1450 | 12       | 40        | 1     | 1    | 2        | 7         | 0.16      | 22.2             | 19                    | 0.406054306 | 65                 |
| 162        | 1600 | 49       | 16.5      | 1     | 1    | 5        | 0         | 0.026     | 7.5              | 30                    | 0.378345024 | 115                |
| 163        | 1500 | 49       | 16.5      | 1     | 1    | 5        | 0         | 0.026     | 7.5              | 30                    | 0.378345024 | 115                |
| 164        | 1304 | 49       | 16.5      | 1     | 1    | 5        | 0         | 0.026     | 7.5              | 30                    | 0.378345024 | 115                |
| 165        | 1510 | 29       | 31        | 0     | 1    | 1        | 1         | 0.07      | 17.8             | 29                    | 0.40409947  | 76                 |
| 166        | 1570 | 45       | 1         | 1     | 1    | 4        | 1         | 0.028     | 10.7             | 24                    | 0.378345024 | 101                |
| 167        | 1590 | 45       | 0.5       | 1     | 1    | 4        | 1         | 0.03      | 10.7             | 24                    | 0.378345024 | 97                 |
| 168        | 1538 | 49       | 16.5      | 1     | 1    | 5        | 0         | 0.0275    | 7.5              | 30                    | 0.38        | 105                |
| 169        | 1481 | 49       | 16.5      | 1     | 1    | 5        | 0         | 0.0275    | 7.5              | 30                    | 0.38        | 105                |
| 170        | 1378 | 49       | 16.5      | 1     | 1    | 5        | 0         | 0.0275    | 7.5              | 30                    | 0.38        | 105                |
| 171        | 1547 | 49       | 16.5      | 1     | 1    | 5        | 0         | 0.0275    | 7.5              | 30                    | 0.38        | 105                |
| 172        | 1605 | 51.5     | 39        | 1     | 1    | 7        | 1         | 0.02      | -5.1             | 39                    | 0.39131532  | 118                |
| 173        | 1480 | 24.5     | 109.5     | 1     | 1    | 9        | 3         | 0.04      | 6.9              | 41                    | 0.383797175 | 93                 |
| 174        | 1464 | 56       | 40.5      | 1     | 1    | 7        | 1         | 0.024     | -5.1             | 39                    | 0.384102389 | 116                |
| 175        | 1390 | 42.05    | 104       | 1     | 1    | 9        | 3         | 0.13      | 6.9              | 41                    | 0.384378768 | 73                 |

CC = cranium capacity in cm<sup>3</sup>; latitude = absolute latitude from equator; longitude = absolute longitude from prime meridian, north: 1 = north of the equator, 0 = south of the equator; east: 1 = east of prime meridian, 0 = west of prime meridian; location = location factor for parasite calculation; parasite = number of parasites found in location; Age = age of cranium in mya; Mean temperature = mean twentieth-century temperature; Temperature variation = difference between highest monthly high temperature and lowest monthly low temperature; Isosd = standard deviation of δ<sup>18</sup>O record for 200,000 years preceding cranium's age; Population density = number of crania discovered at or outside a 30° radius from Al Mashriq, Ethiopia, at or before the time the cranium was dated (see Methods)

Table B: Fossil index

| No. | Fossil                                                          |
|-----|-----------------------------------------------------------------|
| 1   | SK 47 (adult)                                                   |
| 2   | SK 27                                                           |
| 3   | SK 847                                                          |
| 4   | Stw 53                                                          |
| 5   | Omo L894-1                                                      |
| 6   | ER1470                                                          |
| 7   | ER1813                                                          |
| 8   | ER3732                                                          |
| 9   | ER1590 (juv. 8 year old)                                        |
| 10  | ER1805                                                          |
| 11  | Modjokerto (adult) (Perning I, Pithecanthropus V)               |
| 12  | OH24 (Olduvai hominid 24)                                       |
| 13  | ER3733 (Koobi Fora)                                             |
| 14  | OH7 (adult) (Olduvai hominid)                                   |
| 15  | Dmansi 2280                                                     |
| 16  | Dmansi 2282                                                     |
| 17  | Dmansi (D2700)                                                  |
| 18  | OH16 (adult) (Olduvai hominid)                                  |
| 19  | OH13 (adult) (Olduvai hominid)                                  |
| 20  | Sangiran 31 (S 31)                                              |
| 21  | KNM-WT 15000 (adult) (WT 15K) (Nariokotome)                     |
| 22  | ER3883 (Koobi Fora)                                             |
| 23  | Sangiran 9 (Pithecanthropus IX)                                 |
| 24  | OH9 (Chellean man)                                              |
| 25  | Gongwangling 1(Lantian I, Lantian 2)                            |
| 26  | Buia                                                            |
| 27  | Sangiran 4 (Pithecanthropus IV) (Homo erectus IV) (S4)          |
| 28  | Trinil 2 (Pithecanthropus I, Homo erectus I)                    |
| 29  | Sangiran 2 (Pithecanthropus II, Homo erectus II) (S2)           |
| 30  | Sangiran 3 (adult) (Pithecanthropus III, Homo erectus III) (S3) |
| 31  | Sangiran 12 (Pithecanthropus VII, Homo erectus VII) (S12)       |
| 32  | Sangiran 17 (Pithecanthropus VIII, Homo erectus VIII) (S17)     |
| 33  | Skhul 2                                                         |
| 34  | Skhul 4                                                         |
| 35  | Skhul 5                                                         |
| 36  | Skhul 9                                                         |

---

| No. | Fossil                                                        |
|-----|---------------------------------------------------------------|
| 37  | Sangiran 10 (Pithecanthropus V, VI; Homo erectus V, VI) (S10) |
| 38  | Ceprano                                                       |
| 39  | OH 12                                                         |
| 40  | Ternifine (Tighenif)                                          |
| 41  | La Ferrassie 1                                                |
| 42  | Bodo                                                          |
| 43  | Gibraltar 1 (Forbes' Quarry)                                  |
| 44  | Teshik-Tash (adult)                                           |
| 45  | Monte Circeo I                                                |
| 46  | Amud 1                                                        |
| 47  | Sambungmacan 1                                                |
| 48  | Neandertal 1                                                  |
| 49  | Ganovce 1                                                     |
| 50  | La Chapelle-aux-Saints                                        |
| 51  | La Quina 5 (H5)                                               |
| 52  | Shanidar 1                                                    |
| 53  | Shanidar 5                                                    |
| 54  | Spy 1                                                         |
| 55  | Spy 2                                                         |
| 56  | Arago 21 (XXI and XLVII)                                      |
| 57  | Salé 1                                                        |
| 58  | Zhoukoudian D1 (II) (Sin II)                                  |
| 59  | Zhoukoudian (III)                                             |
| 60  | Zhoukoudian H3 (V)                                            |
| 61  | Zhoukoudian L1 (X) (Sin X)                                    |
| 62  | Zhoukoudian L2 (XI)(Sin XI)                                   |
| 63  | Zhoukoudian L3 (XII) (Sin XII)                                |
| 64  | Swanscombe 1                                                  |
| 65  | Galilee                                                       |
| 66  | Le Moustier 1                                                 |
| 67  | Zhoukoudian (VI) (Sin VI)                                     |
| 68  | Broken Hill 1 (Kabwe, Rhodesian)                              |
| 69  | Ndutu 1                                                       |
| 70  | Saldanha 1 (Elandsfontein, Hopefield)                         |
| 71  | Yunxian (EV9002 skull II)                                     |
| 72  | Reilingn                                                      |
| 73  | Steinheim 1                                                   |
| 74  | Eyasi                                                         |

---

| No. | Fossil                                             |
|-----|----------------------------------------------------|
| 75  | Petralona 1                                        |
| 76  | Atapuerca 4 (AT 600)                               |
| 77  | Atapuerca 5 (AT 700)                               |
| 78  | Atapuerca 6 (11-14 year old)                       |
| 79  | Narmada 1                                          |
| 80  | KNM-ER3884                                         |
| 81  | Hexian (PA 830)                                    |
| 82  | Dali 1 (Ta-li)                                     |
| 83  | Ehringsdorf 9                                      |
| 84  | Solo 1 , Ngandong 1                                |
| 85  | Solo 5, Ngandong V,                                |
| 86  | Solo 6, Ngandong VI,                               |
| 87  | Solo 9, Ngandong IX,                               |
| 88  | Solo 10, Ngandong X,                               |
| 89  | Poloyo 1 (PL-1) Sambungmacan 3 (SM 3)              |
| 90  | Jinniushan                                         |
| 91  | Vértesszöllös 2                                    |
| 92  | Biache                                             |
| 93  | Fontéchevade 2                                     |
| 94  | Suard 1, La Chaise                                 |
| 95  | Florisbad 1                                        |
| 96  | KNM-ES-11693 (Eliye Springs)                       |
| 97  | Singa 1                                            |
| 98  | Krapina - D                                        |
| 99  | Krapina 3 (C)                                      |
| 100 | Omo 2, Omo-Kibish 2                                |
| 101 | LH 18 (Laetoli 18) Ngaloba                         |
| 102 | Jebel Irhoud 1 (Djebel Irhoud I) (Jebel Ighoud 1)  |
| 103 | Jebel Irhoud 2 (Djebel Irhoud II) (Jebel Ighoud 2) |
| 104 | Saccopastore 1                                     |
| 105 | Saccopastore 2                                     |
| 106 | Tabun C1                                           |
| 107 | Nanjing                                            |
| 108 | Ngawi                                              |
| 109 | Daka (BOU VP-2/66)                                 |
| 110 | Minatogawa 4                                       |
| 111 | Ngand 11                                           |
| 112 | Minatogawa 2                                       |



---

| No. | Fossil            |
|-----|-------------------|
| 113 | Qafzeh 11         |
| 114 | ZHD-UC 3          |
| 115 | Quina 18          |
| 116 | Dolni Vestonice 3 |
| 117 | StG la R          |
| 118 | Oberk 2           |
| 119 | GdE5              |
| 120 | ZHD-UC 2          |
| 121 | Pataud1           |
| 122 | Minatogawa 1      |
| 123 | AC1               |
| 124 | NazletKhat        |
| 125 | AC2               |
| 126 | Veyrier1          |
| 127 | CapBlanc1         |
| 128 | Predm10           |
| 129 | STeodor5          |
| 130 | AC1-IP            |
| 131 | Oberk1            |
| 132 | ZHD-UC 1          |
| 133 | Mladec5           |
| 134 | Predm4            |
| 135 | AC4               |
| 136 | Pavlov1           |
| 137 | Paderborne        |
| 138 | Qafzeh 9          |
| 139 | Qafzeh 6          |
| 140 | Guattari1         |
| 141 | Bruniquel2        |
| 142 | Predm9            |
| 143 | STeodor3          |
| 144 | STeodor1          |
| 145 | STeodor2          |
| 146 | GdE6              |
| 147 | CM1               |
| 148 | Predm3            |
| 149 | Mladec1           |
| 150 | AC5               |

---

| No. | Fossil                |
|-----|-----------------------|
| 151 | Chancelade            |
| 152 | GdE4                  |
| 153 | BG2                   |
| 154 | Sambungmacan 4        |
| 155 | Lazaret               |
| 156 | Engis 2               |
| 157 | Gibraltar 2 (Devil's) |
| 158 | Krapina B             |
| 159 | Krapina 6 (E)         |
| 160 | Skhul 1               |
| 161 | Herto 1/16            |
| 162 | Brno I                |
| 163 | Brno II               |
| 164 | Brno III              |
| 165 | Border Cave           |
| 166 | Combe Capelle         |
| 167 | Cro Magnon 3          |
| 168 | Dolni Vestonice 14    |
| 169 | Dolni Vestonice 18    |
| 170 | Dolni Vestonice 20    |
| 171 | Dolni Vestonice 21    |
| 172 | Kostenki 2            |
| 173 | Liujiang              |
| 174 | Sungir 1              |
| 175 | Yinkou                |

---
